# Supplementary material for: Analytical Performance of a Novel Latex Turbidimetric Immunoassay, “Nanopia TARC”, for TARC/CCL17 Measurement: A Retrospective Observational Study
Source: MDPI journal article supplement (doi:10.3390/diagnostics13182935), 2023-09-13
Supplement: s1 [file s1]

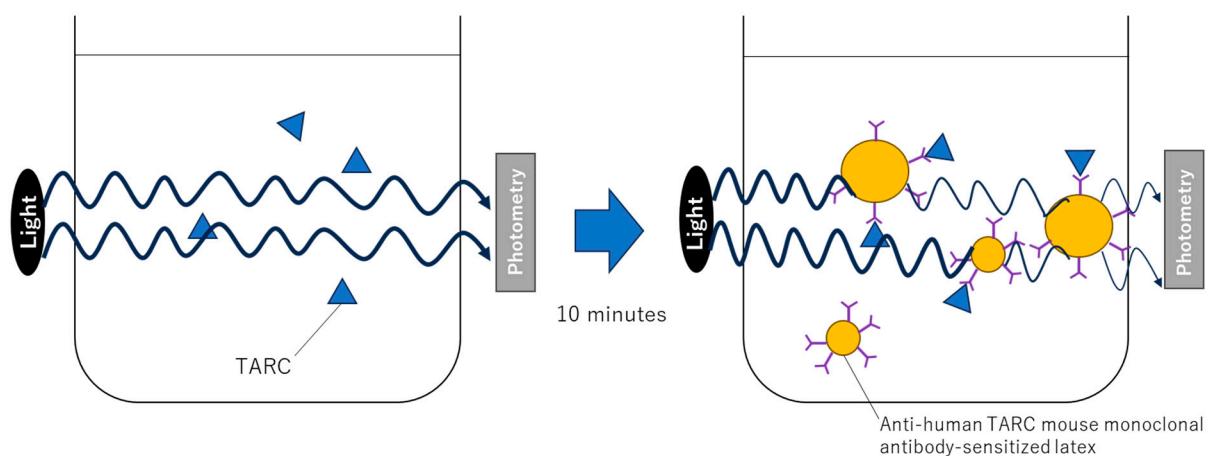

**Figure S1.** A novel latex turbidimetric immunoassay, “Nanopia TARC.”

In this homogeneous assay, anti-human TARC mouse monoclonal antibody-sensitized latex is reacted with thymus and activation-regulated chemokine (TARC), and the absorbance is measured directly without separating the bound/free (B/F) molecules. It can be loaded onto a general clinical chemistry analyzer and provides results in 10 min.

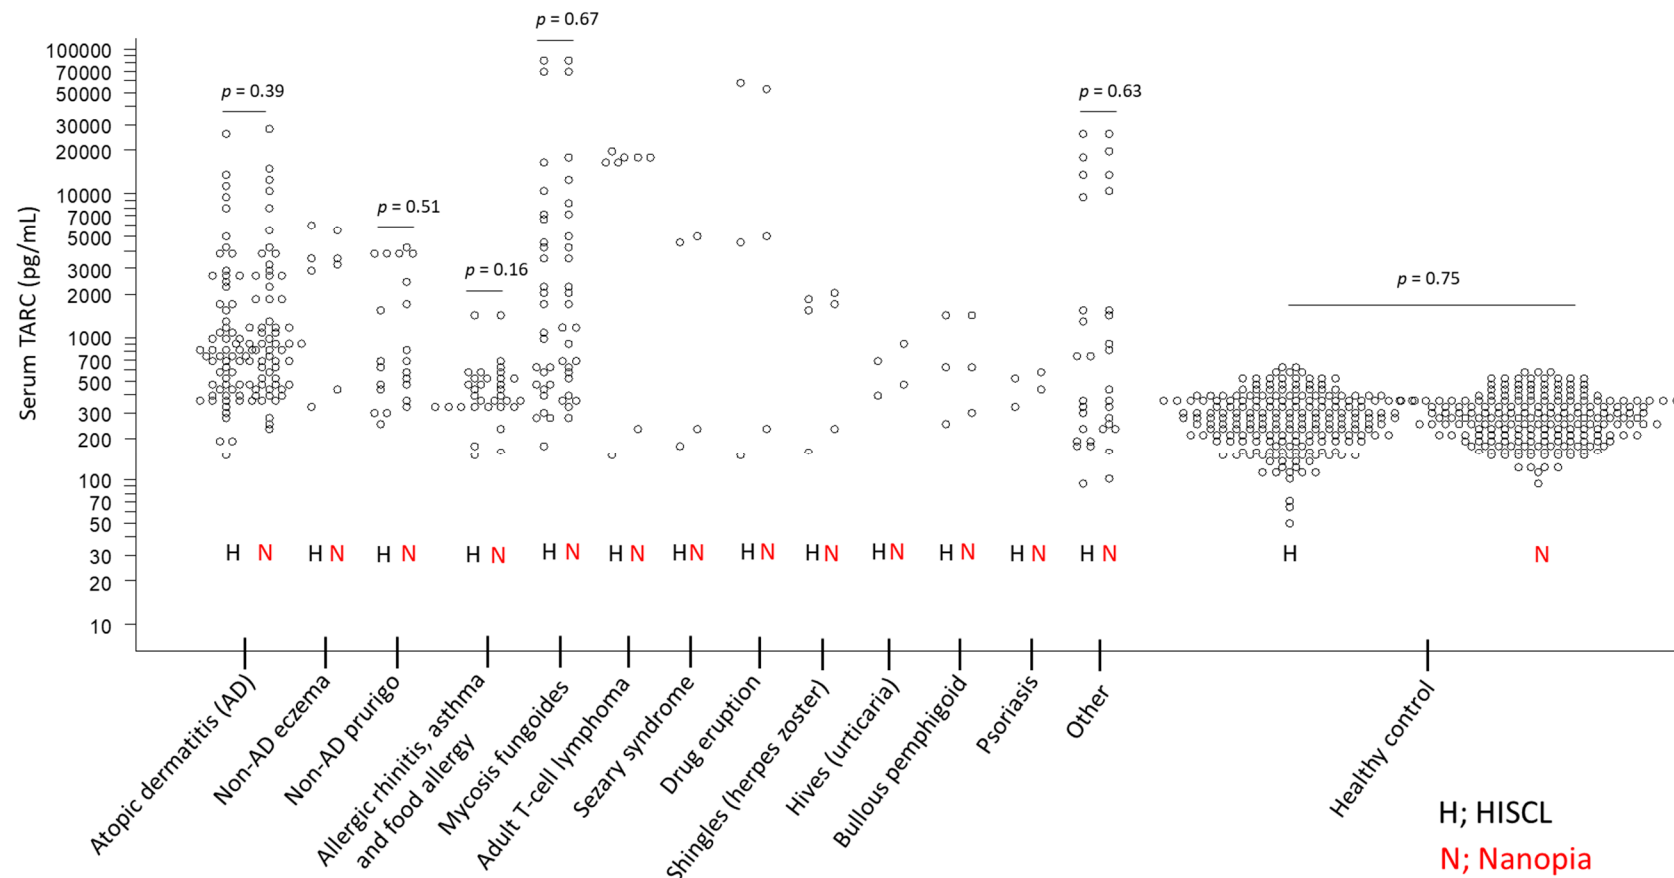

**Figure S2.** Distribution of the thymus and activation-regulated chemokine (TARC) levels measured for allergic and skin diseases.

Dot plots show the distribution of TARC values determined using the two methods (N in red: Nanopia TARC; H in black: HISCL TARC). The Y-axis shows logarithms of serum TARC levels and the X-axis shows the different diseases. The  $p$  value represents the difference between the two methods in diseases with 10 or more cases (Mann–Whitney  $U$  test; significance level set at  $p < 0.001$ ).

**Table S1.** Measurement conditions prescribed in the manufacturer's protocol for LABOSPECT008 $\alpha$ .

|                                        |                                                                               |
|----------------------------------------|-------------------------------------------------------------------------------|
| Principle                              | Absorption spectroscopy                                                       |
| Method                                 | 2-point end assay                                                             |
| Reaction time                          | 10 min                                                                        |
| 1 <sup>st</sup> photometry             | 5.8 min                                                                       |
| 2 <sup>nd</sup> photometry             | 10 min                                                                        |
| Photometric wavelength<br>(main-/sub-) | 570/800 nm                                                                    |
| Sample volume                          | 2.0 $\mu$ L                                                                   |
| 1 <sup>st</sup> reagent volume         | 100 $\mu$ L                                                                   |
| 2 <sup>nd</sup> reagent volume         | 33 $\mu$ L                                                                    |
| Washing reagent                        | HICARRYNON<br>(Citric acid monohydrate <10%,<br>oxyethylene = alkyl ether 5%) |
| Calibration curve                      | Multi-point spline curve                                                      |
